# Supplementary material for: Benthic Foraminifera as Indicators of River Discharge in the Western South Atlantic Continental Shelf Margin
Source: Preprints.org preprint supplement (doi:10.20944/preprints201810.0715.v1), 2018-10-30
Supplement: Supplementary file 1 [file Table1_relative_winter.xls]

## Sheet: Sheet1
Winter/2003	0	1	2	3	4	5	6	11	12	13	14	15	16	17	18	19	20	21	22	26	27	28	29	30	31	32	33	34	36	37	38	42	43	44	45	46	47	48	49	50	51	52	53	54	58	59	60	61	62
Ammonia becarii	97.4843	9.23077	6.69371	0	8.03213	0	10.4712	0	0	0.755668	3.22581	7.79221	17.3913	0	8.21918	1.81818	6.55738	0	0	0.330033	0	4.16667	0	0	0	48.3871	1.33333	7.69231	2.66667	0	23.0769	0	0	0	17.2222	0	0	0	5.17241	0	1.05263	0	0	2.07337	0	0	0	2.99145	0
Ammonia rolshauseni	0	0	0	0	0	0	0	0	0	0.251889	0	0	0	0	0	3.63636	0	0	0	0	0	0	0	0	0	0	0	0	2.66667	0	0	0	0	0.56338	0	1.51976	0	0	0	0	2.63158	0	0	0	0	0.0294118	0	0	74.3243
Amphicoryna scalaris	0	0	0	0	0	0	0	0	0	0	0.537634	0	0	0	0	0	0	0	0	0	0	0	0	0	0	0	0	0	0	0	0.404858	0.431965	0.2032	0	0	0	0	0	0	33.3333	0	0	0	1.91388	2.1978	0	0.536673	0	0
Anglogerina angulosa	0	0	0	0	0	0	51.0471	5.03145	0	0	0	0	0	0	0	0	0	0	0	4.45545	0	0	0	0	0	0	0	0	0	0	0	0	0	0	0	0	0	0	0	0	0	0	0	0	0	0	0	0	0
Astacolus crepidulus	0	0	0	0	0	0	0	0	0	0	0	0	0	0	0	0	0	0	0	0	0	0	0	0	0	0	0	0	0	0	0	0	0	0	0	0	0	0	0	0	0	0	0	0	0	0	0	0.854701	0
Bigenerina irregularis	0	0	0	0	0	0	0	0	8.59375	0	0	0	0	0	0	0	0	0	0	0	0	0	0	0	0	0	0	0	0	0	0	0	0	0	0	0	0	0	0	0	0	0	0	0	0	0	0	0	0
Bolivina pulchella	0	0	0	0	0	0	0	0	0	0	0	0	0	0	0	0	0	0	0	0	0	0	0	0	0	0	0	0	0	0	0	0	0	0	0	0	0	0	0	0	0	0	0	0	0	0	0	0	0
Bolivina striatula	0	15.3846	1.41988	0	0	0	0	0.628931	0.78125	0.755668	3.76344	0	8.69565	16.5517	2.73973	0	1.63934	0	0	1.15512	0	7.5	0	34.7826	4.69484	3.22581	21.3333	7.69231	13.3333	1.03093	7.69231	4.9676	3.04801	7.88732	2.77778	2.43161	22.2222	40	18.9655	33.3333	2.63158	1.26582	0	6.06061	1.53846	4.70588	8.94454	11.1111	4.05405
Buccella peruviana	0.628931	29.2308	17.8499	48.2743	6.0241	54.9818	7.06806	40.8805	31.25	44.0806	34.4086	35.0649	0	40.6897	8.21918	50.9091	11.4754	50	74.5	25.4125	45.1807	49.1667	50	13.0435	44.1315	0	28	15.3846	5.33333	10.3093	0	7.34341	19.7104	14.0845	0	5.77508	0	0	17.2414	0	1.05263	0	5.06912	0	0	1.47059	0	1.7094	13.5135
Bulimina elongata	0	0	3.85396	2.36007	0	0	0	0	2.34375	4.53401	4.83871	0	0	2.75862	4.10959	7.27273	6.55738	4.16667	0.5	0	0	7.5	0	17.3913	2.34742	0	1.33333	0	0	0	0	2.80778	0	0	0	0	0	0	0	0	1.31579	0	0	0	0	0	0	0	0
Bulimina marginata	1.25786	3.07692	11.7647	4.07649	0	0	0	0	0	16.3728	17.2043	5.19481	0	0	6.84932	9.09091	1.63934	8.33333	0.5	21.6172	9.03614	0	0	0	13.1455	9.67742	0	0	42.6667	65.9794	36.4372	9.07127	15.8496	27.6056	31.1111	23.4043	0	2.10526	0	0	19.2105	22.7848	7.8341	2.87081	0	2.64706	5.54562	5.12821	0
Buliminella elegantissima	0	1.53846	0.40568	0.643657	0	0	0	0.628931	0	8.06045	1.07527	0	0	26.2069	5.47945	3.63636	0	4.16667	1	0.330033	0	4.16667	0	0	19.2488	0	35.3333	0	5.33333	0	0	0	0	1.69014	0.555556	7.59878	0	33.6842	20.6897	0	1.31579	0	0.921659	0.15949	0	0	0	0.854701	0
Cancris sacra	0	0	0.20284	0	0	0	0.52356	0	0	0	0	0	0	0	0	0	0	0	0	0	0	0	0	0	0	0	0	0	4	0	0.404858	0	1.2192	5.07042	0	0	0	0	0	0	7.10526	2.53165	2.30415	1.5949	0.43956	0	0.715564	2.99145	0
Cassidulina crassa porrecta	0	0	0	0	0	0	0	0	0	0	0	0	0	0	0	0	0	0	0	10.396	0	0	0	0	0	0	0	0	0	0	0	0	0	0	0	0	0	0	0	0	0	0	0	0	0	0	0	0	0
Cassidulina subglobosa	0	4.61538	2.23124	0.643657	0	8.4	3.9267	16.3522	0	3.02267	1.07527	3.8961	4.34783	0	8.21918	0	3.27869	4.16667	0	0.660066	0	4.16667	0	4.34783	0	6.45161	0.666667	0	1.33333	2.06186	10.1215	11.4471	22.5552	16.0563	7.77778	0.303951	0	3.15789	3.44828	0	30.5263	0	27.6498	39.7129	76.9231	73.5294	68.6941	38.4615	5.40541
Cassidulinoides parkerianus	0	0	0	0	0	0	0	0	0	0	0	0	0	0	0	0	0	0	0	0	0	0	0	0	0	0	0	0	0	0	0	0	0	0	0	0	0	0	0	0	0	0	0	0	0	0	0	0	0
Cibicides fletcheri	0	0	0	0	0	0	0	0	0	0	0	0	0	0	0	0	0	0	0	0	0	2.5	0	0	0	0	0	0	0	0	0.809717	0	0	0	0	0.303951	0	0	0	0	0	0	0	0	0	0	0	0	0
Cibicides mackannai	0	0	2.23124	9.01119	0	10.6909	10.2094	22.0126	27.3438	3.52645	2.15054	1.2987	0	0	17.8082	7.27273	0	8.33333	5.5	0	0	0	0	0	0	0	0	0	0	0	0	0	0	0	0	0	0	0	0	0	0	0	0	0	0.879121	0	0.536673	0	0
Cibicides refulgens	0	0	0	0	0	0	0	0	0	0	0	0	0	0	0	0	0	0	0	0	0	0	0	0	0	0	0	0	0	0	0	0	0	0	0	0	0	0	0	0	0	0	0	0.318979	0.879121	0	0	0	0
Cibicides variabilis	0	0	0.40568	0	0	0	0	0	0	0.251889	0	0	0	0	0	0	1.63934	0	0	0	0.60241	0	0	0	0	0	0	0	0	0	0	0	0.609601	0	0	0	0	0	0	0	0	0	0	0	1.75824	0	0	0	0
Cibicides sp.	0	0	0	0	0	0	0	0	0	0	0	0	0	0	0	0	4.91803	0	0	1.15512	0	0	0	4.34783	0	0	0	0	0	0	0	0	0	0	0	0	0	0	0	0	0	0	0	0	0	0	0	0	0
Cornuspyra involves	0	0	0	0	2.81124	0	0	0	0	0	0	0	0	0	0	0	0	0	4	0.165017	0	0	0	0	0	0	0	0	0	0	0	0	0	0	0	0	0	0	0	0	0	0	0	0	0	0	0	0	0
Dentalina sp.	0	0	0	0	0	0	0	0	0	0	0	0	0	0	0	0	0	0	0	0	0	0	0	0	0	0	0	0	0	0	0.404858	0	0	0	0	0	0	0	0	0	0	0	0	0	0	0	0	0	0
Discorbis peruvianus	0	0	0.608519	0.214552	0	0	0	0	1.5625	0.251889	0	0	0	0	0	0	0	0	0	0	0	0	0	8.69565	1.40845	0	0	0	0	0	0	0	0	0	0	0	0	0	0	0	0	0	0	0	0.43956	0	0	0	0
Discorbis williamsoni	0.628931	16.9231	4.25963	6.43657	40.1606	1.52727	11.7801	0	0	0.251889	3.76344	14.2857	26.087	3.44828	5.47945	3.63636	8.19672	0	0	1.48515	0	2.5	0	0	1.87793	0	0	0	0	3.09278	0	0	0	0.56338	0	4.86322	0	3.15789	0	0	0.526316	0	0	0.478469	0	0.588235	0.536673	0	0
Discorbis bertheloti	0	0	0	0	0	0	0	0	0	0	0	0	0	0	0	0	0	0	0	0	0	0	0	0	0	0	0	0	0	0	0	0	0	0	0	0	0	0	0	0	0	0	0	0	0	0	0	0	0
Ehrenbergina pupa	0	0	0	0	0	0	0	0	0	0	0	0	0	0	0	0	0	0	0	3.46535	0	0	0	0	0	0	0	0	0	0	0	0	0	0	0	0	0	0	0	0	0	0	0	0	0	0	0	0	0
Elphidium discoidale	0	0	0.20284	0	0	0	0	0	0	0	0	2.5974	0	0	1.36986	0	0	0	0	0	0	0	0	0	0	0	0	0	0	0	0	0	0	0	0.555556	0	0	0	0	0	8.15789	0	0	0.478469	0	0	0	0	0
Elphidium excavatum	0	0	4.46247	0	0	0	0	0	0	0.251889	2.68817	5.19481	0	3.44828	16.4384	0	3.27869	0	0	0	0	0	0	8.69565	7.04225	0	10	61.5385	0	0	0	0	0	0	0	0	0	0	27.5862	0	0	0	0	1.11643	0	0.882353	0	1.28205	0
Elphidium gunteri	0	0	0.40568	0	0	0	0	0	0	0	0	1.2987	0	0	0	0	0	0	0	0	0	0	0	0	0	0	0	0	0	0	0	0	0	0	0	0	0	0	0	0	0	0	0	0	0	0	0	0	0
Elphidium poeyanum	0	0	0.20284	0	0	0	0	0	0	0	1.07527	0	0	0	0	3.63636	0	0	0	0	0.60241	0	0	0	0	0	0	0	0	0	0	0.647948	0.2032	1.69014	0	23.4043	44.4444	14.7368	0	0	0	0	0	0	0.43956	0	0	2.13675	0
Fissurina laevigata	0	0	0.20284	0.429104	0	0	0	0	0.78125	0.251889	0	0	4.34783	0	0	0	0	4.16667	0	0.330033	0.60241	0	0	0	0	0	0	0	0	0	0	0.431965	0.609601	0	0	0	0	0	0	0	0.526316	0	0	0	0.43956	0.294118	0	0	0
Fursenkoina pontoni	0	0	0.20284	0.214552	0	0.763636	0	0	0	0.755668	0.537634	0	0	0	0	0	0	0	0	0	0	0	0	0	0	0	0	0	0	0	0	0	0	0	0	0	0	0	0	0	0.263158	1.26582	0	0	0	0	0	0	0
Fursenkoina sp.	0	0	0	0	0	0	0	0	0	0	0	0	0	0	1.36986	0	0	0	0	0	0	0	0	0	0	0	0	0	0	0	0	0	0	0	0	0	0	0	0	0	0	0	0	0	0	0	0	0	0
Gutulina sp.	0	0	0	0	0	0	0.78534	0	0	0	0	0	0	0	0	0	0	0	0	0	0	0	0	0	0	0	0	0	0	0	0	0	0	0	0	0	0	0	0	0	0	0	0	0	0	0	0	0	0
Gypsina vesicularis	0	0	0	0	0	0	0	0	0	0	0	0	0	0	0	0	0	0	0	0	0	0	0	0	0	0	0	0	0	0	0	0	0	0	0	0	0	0	0	0	0	0	0	0	0	0	0	0	0
Hanzawaia boueana	0	0	0	0	0	0	0	0	0.78125	0	0	0	0	0	0	0	0	0	0	0	0	0	0	0	0	0	0	0	0	0	0	0.863931	0.609601	0	4.44444	8.81459	0	0	0	0	1.05263	0	0.460829	0.797448	1.75824	6.47059	0.894454	17.9487	0
Hoeglundina elegans	0	0	0	0	0	0	0	0	0	0	0	0	0	0	0	0	0	0	0	0	0	0	0	0	0	0	0	0	0	0	0.404858	20.0864	0	0	0	0.303951	0	0	0	0	0	0	0	0.318979	0	0	0	0	0
Hopkinsina pacifica	0	0	0	0	0	0	0	0	0	0	0	0	0	0	0	0	0	0	0	0	1.20482	0	0	0	0.938967	0	0	0	1.33333	0	0	0	0.406401	0	0	0.303951	0	0	0	0	0	0	0	0	0	0	0	0	0
Lagena caudata	0	0	0	0.214552	0	0	0	0	0	1.00756	0	0	0	0	0	0	0	0	0	0	0	0	0	0	0	0	0	0	0	0	0.404858	0	0	1.12676	0	0	0	0	0	0	0	0	0	0	0	0	0	0	0
Lagena digitale	0	0	0.20284	0.214552	0	0	0	0	0	0	0	0	0	0	0	0	0	0	0	0	0	0	0	0	0	0	0	0	0	0	0	0	0.2032	0	0	0	0	0	0	0	0	0	0	0	0.659341	0	0	0	0
Lagena distoma	0	0	0	0	0	0	0	0	0	0	0	0	0	0	0	0	0	0	0	0	0	0	0	0	0	0	0	0	0	0	0	0	0.2032	0.56338	0	0	0	0	0	0	0	0	0	0	0	0	0	0	0
Lagena striata	0	0	0	0.643657	0	0	0	0	0	0	0	0	0	0	0	0	0	0	0	0	0	0	0	0	0	0	0	0	0	0	0.404858	1.07991	0.2032	0	0.555556	0	0	0	0	0	1.05263	2.53165	0.921659	1.11643	0.21978	0	0	0.42735	2.7027
Lenticulina sp.	0	0	0	0	0	0	0	0	0	0	0	0	0	1.37931	0	0	0	0	0	0.330033	0	0	0	0	0	0	0	0	0	0	0	0	0	0	0	0	0	0	0	0	0	5.06329	0	0	0	1.17647	0	0	0
Marginulina spp.	0	0	0	0	0	0	0	0	0	0	0	0	0	0	0	0	0	0	0	0	0	0	0	0	0	0	0	0	0	0	0	0	0	0	0	0	0	0	0	0	0	0	0	0.478469	0	0	0	0	0
Miliolinella subrotunda	0	0	0	0	0	0	0	0	0	0	0	0	0	0	0	0	0	0	0	0	0	0	0	0	0	0	0	0	0	0	0	0	0	0	0	0	0	0	0	0	0	0	0	0	0	0	0	0	0
Nonionella opima	0	0	0	0	0	0	0	0	0	0	0	0	0	0	0	0	0	0	0	0	0	0	0	0	0	0	0	0	0	0	0	0	0	0	0	0	0	0	0	0	0.526316	0	0	0	0	0	0	0	0
Oolina melo	0	0	0	0.214552	0	0	0.52356	0	1.5625	0	0	0	0	0	0	0	0	4.16667	0	0	0	0	0	0	0	0	0	0	0	0	0	0.431965	0	0	0	0	0	0	0	0	0	0	0	0	0.43956	0	0.715564	0	0
Oolina vilarboana	0	0	0	0	0	0	0	0	0	0	0	0	0	0	0	0	0	0	0	0	0	0	0	0	0	0	0	0	0	0	0	3.45572	0	0.56338	0	0	0	0	0	0	0	0	0	0	0	0	0	0	0
Oolina universa	0	0	0	0	0	0	0	0	0	0	0	0	0	0	0	0	0	0	0	0	0	0	0	0	0	0	0	0	0	0	0	0	0	0	0	0	0	0	0	0	0	0	0	0.15949	0	0	0	0	0
Orthomorphina filiformis	0	0	0	0	0	0	0	0	0	0	0	0	0	0	0	0	0	0	0	0.165017	0.60241	0	0	0	0	0	0	0	0	0	0	0	0.2286	0	0	0	0	0	0	0	0.263158	2.53165	0.460829	0.637959	0	0	1.07335	0	0
Pseudononion atlanticum	0	0	0	0	0	0	0.52356	0	0	0	0	0	0	0	0	0	0	0	0.5	2.31023	4.81928	0	0	4.34783	1.87793	25.8065	0	0	4	0	4.45344	1.51188	3.65761	3.38028	7.77778	11.2462	11.1111	2.10526	5.17241	33.3333	9.47368	0	9.67742	3.18979	0.21978	2.35294	5.9034	7.26496	0
Pullenia bulloides	0	0	0	0	0.401606	0	1.83246	0	0	0	0	0	0	0	0	0	0	0	0	0	0	0	0	0	0	0	0	0	0	0	0	0	0	0	0	0	0	0	0	0	0	0	0	0	0	0	0	0	0
Poreoponides lateralis	0	0	0	0	0	0	0	0	0	0	0	0	0	0	0	0	0	0	0	0	0	0	0	0	0	0	0	0	0	0	0	0	0	0	0	0	0	0	0	0	0	0	0	0	0	0	0	0	0
Pyrgo elongata	0	0	0	0	0	0	0	0	0	0	0	0	0	0	0	0	0	0	0	0	0	0	0	0	0	0	0	0	0	0	0	0	0	0	0	2.43161	0	1.05263	0	0	0	0	0	0	0	0	0	0	0
Pyrgo nasuta	0	0	7.50507	0	0	0	0	0	0	0	1.6129	0	0	0	0	0	0	0	0	0	0	0.833333	0	0	0	0	0	0	0	2.06186	0.404858	0	0.2032	0.56338	0.555556	1.21581	0	0	0	0	0	0	0.460829	0	0.43956	0.588235	0	0.854701	0
Pyrgo peruviana	0	4.61538	0	0	0	0	0	0	0	0	0	0	0	0	0	0	0	0	0	0	0	0	0	0	0	0	0	0	1.33333	0	0.404858	0	0	0	0	1.21581	0	0	0	0	0.789474	0	0	1.43541	0	0	0	0	0
P. ringens	0	0	4.66531	0	0	0	0	0	0	0	3.76344	0	0	0	1.36986	0	19.6721	0	0	0	0	0	0	0	0	0	0	0	0	0	0	0	0	0	0	0	0	0	0	0	0	0	0	0	0	0	0.536673	0	0
Quinqueloculina angulata	0	0	0	0	0	0	0	0	0	0	0	0	0	0	0	0	0	0	0	0	0	0	0	0	0	0	0	0	0	0	0	0	0	0	0	0	0	0	0	0	0	0	0	0	0	0	0	0	0
Quinqueloculina horrida	0	0	2.83976	0	0	0	0	0	0	0	1.07527	0	0	0	0	0	0	0	0	0	0	0	0	0	0	0	0	0	0	0	0	0	0	0	0	0	0	0	0	0	0	0	0	0	0	0	0	0	0
Quinqueloculina lamarckiana	0	0	7.91075	0	0	0	0	0	0	0	2.15054	0	0	4.82759	0	0	16.3934	0	0	0	0	2.5	0	0	0	0	0	0	8	6.18557	0	0	0	0	0	1.82371	0	0	0	0	0	0	0	0.15949	0.21978	0.294118	0	0	0
Quinqueloculina miletti	0	6.15385	0.608519	0	0	0	0	0	0	0	0	0	8.69565	0	0	0	0	0	0	0	0	0	0	0	0.938967	0	0	0	1.33333	0	0	0	0	0	0	0	0	0	0	0	0	0	0	0	0	0	0	0	0
Quinqueloculina patagonica	0	0	12.1704	0	0	0.763636	0	0	0	0	10.7527	9.09091	0	0	8.21918	3.63636	0	8.33333	0	0	0	4.16667	0	0	0	3.22581	0	7.69231	1.33333	3.09278	0	0	0	0	0	1.21581	0	0	0	0	0	0	0.460829	0	0	0	0	0	0
Quinqueloculina sp.	0	0	0.20284	0	0	0	0	0	0	0	1.6129	0	0	0	0	0	0	0	0	0	0	0	0	0	0	0	0	0	0	0	0	0	0	0	0	0	0	0	0	0	0	0	0	0	0.659341	0	0	0	0
Robulus sp.	0	0	0	0	0	0	0	0	0	0	0	0	0	0	0	0	0	0	0	0	0	0	0	0	0	0	0	0	0	0	0.404858	0	0.406401	0	0	0	0	0	0	0	0.789474	0	0	0	0.21978	0	2.86225	0	0
Sigmoilina obesa	0	0	0	0	0	0	0	0	0	0	0	0	0	0	0	0	0	0	0	0	0	0	0	0	0	0	0	0	0	0	0	0	0	0	0	0	0	0	0	0	0	0	0	0	0	0	0	0	0
Spiroculina depressa	0	0	0.811359	0	0	0	0	0	0	0	0	0	0	0	0	0	3.27869	0	0	0	0	0	0	0	0	0	0	0	0	0	0	0	0	0	0	0	0	0	0	0	0	0	0	0.15949	0.21978	0	0	0	0
Triloculina	0	0	0	0	0	0	0	0	0	0	0	0	0	0	0	0	0	0	0	0	0	0	0	0	0	0	0	0	0	0	0	0	0	0	0	0	0	0	0	0	0	0	0.921659	0	0.21978	0	0	0	0
Uvigerina peregrina	0	0	0.20284	0	0	6.10909	0	0	0	0	0	0	0	0	1.36986	0	0	0	0.5	4.9505	0	0	0	0	0	0	0	0	1.33333	1.03093	7.28745	20.3024	14.224	8.4507	25	0	0	0	0	0	5.52632	59.4937	41.4747	18.3413	7.25275	1.17647	2.50447	4.70085	0
Uvigerina bifurcata	0	0	0	0	0	0.763636	0	0	0	0	0	0	0	0	0	0	0	0	0	0	0	0	0	0	0	0	0	0	0	0	0	14.9028	15.4432	8.4507	0	1.21581	0	0	0	0	0	0	0	0	0	0	0	0	0
Virgulina riggi	0	0	0	0	0	0	0	0	0	0	0	0	0	0	0	0	0	0	0	0	0	0	0	0	0	0	0	0	0	0	0	0	0	0	0	0	0	0	0	0	0	0	0	0	0	0	0	0	0
Ammobaculites exigus	0	0	0	1.30597	2.00803	0	0	0	0	3.02267	0	0	0	0	0	1.81818	0	0	4	0.165017	10.241	0	0	0	0	0	0	0	0	0	0	0	0	0	0	0	0	0	0	0	0	0	0	0	0.21978	0	0	0	0
Ammodiscus sp.	0	0	0	0	0	0	0	1.88679	1.5625	0	0	0	0	0	0	0	0	0	0	0	0	0	0	0	0	0	0	0	0	0	0	0	0	0	0	0	0	0	0	0	0	0	0	0	0	0	0	0	0
Ammotium salsum	0	0	0	0	1.20482	0	0	1.25786	0	2.267	0.537634	0	0	0	0	0	0	0	2	0.825083	0.60241	1.66667	0	0	0	0	0	0	0	0	0	0	0	0.56338	0	0	0	0	0	0	0	0	0	0	0	0	0	0	0
Arenoparella mexicana	0	0	0	0.643657	12.0482	0.763636	0.78534	3.77358	9.375	0.251889	0.537634	0	0	0	0	0	0	4.16667	3.5	7.26073	10.241	0.833333	0	0	0	0	0	0	1.33333	0	0	0.215983	0	0.56338	0	0	0	0	1.72414	0	0.526316	0	0.921659	0.15949	0.21978	0	0	0.854701	0
Deuteramina	0	0	0	0	0	0	0	0	0	0	0	0	0	0	0	0	4.91803	0	0	0	0	0	0	0	0	0	0	0	0	0	0	0	0	0	0	0	0	0	0	0	0	0	0	0	0	0	0	0	0
Gaudryina exillis	0	1.53846	0	0	5.62249	0	0.26178	0	7.8125	0	0	0	0	0	0	0	0	0	3.5	1.65017	5.42169	0	0	0	0	0	0.666667	0	2.66667	3.09278	0	0	0	0	0	0	22.2222	0	0	0	0	0	0.460829	0	0	0	0	0	0
Haplophragmoides wilberti	0	0	0	0	0	3.05455	0	0	0	0	0	0	0	0	0	0	0	0	0	2.14521	0	0	0	0	1.87793	0	0	0	0	0	0.404858	0	0	0	0	0	0	0	0	0	0	0	0	0.15949	0	0	0	0	0
Miliammina fusca	0	0	0	0	0	0	0	0	0	0.251889	0	0	0	0	0	3.63636	0	0	0	0	0	0.833333	0	0	0	0	0	0	0	1.03093	0	0	0	0	0	0	0	0	0	0	0.263158	0	0	0	0	0	0	0	0
Protoschista findens	0	0	0	0	0	0	0	0	0	0	0	0	0	0	0	0	0	0	0	0	0	0	0	0	0	0	0	0	0	0	0	0	0	0	0	0	0	0	0	0	0	0	0	0	0	0	0	0	0
Pseudoclavulina curta	0	0	0	0	0	0	0	0	0	1.25945	0.537634	0	0	0	0	0	0	0	0	0	0	0	0	0	0	0	0	0	0	0	0	0	0	0	0	0	0	0	0	0	0	0	0	0	0	0	0	0	0
Pseudoclavulina sp.	0	0	0	0.214552	0	0	0	0	0	0.251889	0	0	0	0	0	0	0	0	0	0	0	0	0	0	0	0	0	0	0	0	0	0	0	0	0	0	0	0	0	0	0	0	0	0	0	0	0	0	0
Reophax nana	0	0	0	0	18.8755	0	0	0	0	0.503778	0	0	4.34783	0.689655	0	0	0	0	0	0	0	0	0	0	0	0	0	0	0	1.03093	0	0	0	0	0	0	0	0	0	0	0	0	0	0	0	0	0	0	0
Reophax curtus	0	0	0	0.429104	0	0	0	0	0	0.251889	0	0	0	0	0	0	0	0	0	6.27063	0	0	0	0	0	0	0	0	0	0	0	0	0	0	0	0	0	0	0	0	0	0	0	0	0	0	0	0.42735	0
Reophax scorpiurus	0	0	1.0142	23.1716	0	0	0	0	0	5.54156	0	0	0	0	0	0	0	0	0	0	4.81928	0	0	0	0	0	0	0	0	0	0	0	0	0	0	0	0	0	0	0	0	0	0	0	0	0	0	0	0
Siphotrochamina lobata	0	1.53846	0.20284	0.429104	2.81124	0	0	0	0	0.251889	0	0	13.0435	0	0	0	0	0	0	0	0	0	0	0	0.469484	0	1.33333	0	0	0	0	0	0	0	0	0	0	0	0	0	0	0	0	0	0	0	0	0	0
Textularia earlandi	0	6.15385	0	0	0	0	0	0	0	0	0	0	0	0	0	0	4.91803	0	0	0	0	5	50	0	0	0	0	0	0	0	1.61943	0	0	0	1.66667	0	0	0	0	0	0.789474	0	0	0	0.879121	0	0	0	0
Textularia gramen	0	0	3.85396	0	0	0	0	0	0	0	1.07527	14.2857	0	0	0	0	0	0	0	0	0	0	0	0	0	0	0	0	0	0	0	0	0	0	0	0	0	0	0	0	0	0	0	0	0.21978	0	0	0	0
Tiphotrocha comprimata	0	0	0	0	0	0	0	0	0	0	0	0	13.0435	0	0	0	1.63934	0	0	0	0	0	0	0	0	0	0	0	0	0	0	0	0	0	0	0	0	0	0	0	0	0	0	0	0	0	0	0	0
Trochammina inflata	0	0	0	0	0	2.29091	0.26178	6.28931	3.90625	0	0	0	0	0	2.73973	0	0	0	0	2.64026	0.60241	0	0	0	0	0	0	0	0	0	0	0	0	0	0	0	0	0	0	0	0	0	0	0	0	0	0	0	0
Trochammina sp.	0	0	0.20284	0.214552	0	0	0	0	1.5625	0	0	0	0	0	0	0	0	0	0	0	0	0	0	0	0	0	0	0	0	0	0	0	0.2032	0	0	0.607903	0	0	0	0	0	0	0	0	0	0	0	0	0
Globigerina aequilateralis	0	0	0	0	0	0	0	0	0	0	0	0	0	0	0	0	0	0	0	0	0	0	0	0	0	0	0	0	0	0	0	0	0	0	0	0	0	0	0	0	0.789474	0	0	0	0	0	0	0	0
Globgerina falcanensis	0	0	0	0	0	9.16364	0	0	0	0	0	0	0	0	0	0	0	0	0	0	0	0	0	0	0	0	0	0	0	0	0	0	0	0	0	0	0	0	0	0	0	0	0	0	0	0	0	0	0
Globigerina pachyderma	0	0	0	0	0	0.763636	0	0	0	0	0	0	0	0	0	0	0	0	0	0	0	2.5	0	0	0	0	0	0	0	0	0	0	0	0	0	0	0	0	0	0	0	0	0	0.318979	0	0	0	0	0
Globigerinita uvula	0	0	0	0	0	0	0	0	0	0	0	0	0	0	0	0	0	0	0	0	0	0	0	0	0	0	0	0	0	0	0	0	0	0	0	0	0	0	0	0	0.526316	0	0	0	0	0	0	0	0
Globigerinoides ruber	0	0	0	0	0	0	0	0	0	0.251889	0	0	0	0	0	0	0	0	0	0	0	0	0	0	0	0	0	0	0	0	2.83401	0	0	0	0	0	0	0	0	0	1.31579	0	0	13.7161	0	1.47059	0	0	0
Globigerinoides trilobus (saculifera)	0	0	0	0	0	0	0	0	0	0	0	0	0	0	0	0	0	0	0	0	0	0	0	0	0	0	0	0	0	0	0.404858	0	0	0	0	0	0	0	0	0	0	0	0	0	0	0	0	0	0
Globorotalia sp.	0	0	0	0	0	0	0	0	0	0.503778	0	0	0	0	0	0	0	0	0	0	0	0	0	0	0	0	0	0	0	0	0	0	0	0	0	0	0	0	0	0	0	2.53165	0	0	0	0	0	0	0
Globorotalia truncatulinoides	0	0	0	0	0	0	0	0	0	0	0	0	0	0	0	0	0	0	0	0	0	0	0	0	0	0	0	0	0	0	0.809717	0	0	0	0	0	0	0	0	0	0	0	0	1.43541	0	0	0	0	0
Globorotalia menardi	0	0	0	0	0	0	0	0	0	0	0	0	0	0	0	0	0	0	0	0	0	0	0	0	0	0	0	0	0	0	0	0	0	0	0	0	0	0	0	0	0	0	0	0	0	2.3	0	0	0
Neogloboquadrina duteitrei	0	0	0	0	0	0	0	0	0	0.755668	0	0	0	0	0	0	0	0	0	0	0	0	0	0	0	0	0	0	0	0	0	0	0	0	0	0	0	0	0	0	0	0	0	0	0	0	0	0	0
Neogloboquadrina sp.	0	0	0	0	0	0	0	0	0	0.251889	0	0	0	0	0	0	0	0	0	0	0	0	0	0	0	0	0	0	0	0	0	0	0	0	0	0	0	0	0	0	0	0	0	0	0	0	0	0	0
Pulleatina obliquiloculata	0	0	0	0	0	0	0	0	0	0	0	0	0	0	0	0	0	0	0	0	0	0	0	0	0	0	0	0	0	0	0	0	0	0	0	0	0	0	0	0	0	0	0	0.637959	0	0	0	0	0
Thecamoebians	0	0	0	0	0	0	0	1.25786	0.78125	0	0	0	0	0	0	0	0	0	0	0.330033	5.42169	0	0	4.34783	0	3.22581	0	0	0	0	0.404858	0	0	0.56338	0	0	0	0	0	0	0	0	0	0	0	0	0	0	0
Number of total individuals	954	65	493	1072	249	495.6	3056	157	127	2340	186	77	23	145	73	55	61	24	800	30200	314	117	2	110	639	30	150	13	300	194	1888	4630	3937	706	720	1316	36	95	58	3	2960	924	3906	4208	5460	9813	5031	8424	2664
[truncated: 16 more columns]
