# Supplementary material for: Benthic Foraminifera as Indicators of River Discharge in the Western South Atlantic Continental Shelf Margin
Source: Preprints.org preprint supplement (doi:10.20944/preprints201810.0715.v1), 2018-10-30
Supplement: Supplementary file 2 [file Table2_relative_summer.xls]

## Sheet: Sheet1
Summer 2004	0	1	2	4	5	6	12	13	14	15	16	17	19	20	21	22	23	24	30	31	32	33	34	37	38	39	40	41	42	48	49	50	51	52	53	57	58	59	60	61	62	63	64	65	66	73	75	76	79
Ammonia becarii	8.10811	0	2.0979	0	0	0	0	0	3.39806	50	2.80374	0	0	0	0	0	0	0	0	4.06504	0	0	0	0.947867	1.63934	2.85714	0	0	0.589971	0	0	0	0	0	0	0	0	0	0	3.28767	0	0	4.1184	0	0	0	0	0	0.192308
Ammonia rolshauseni	0	0	0	0.633714	0	0	0	0	0	0	0	0	0	0	0	0	0	0	0	0	0	0	0	0	0	0	0	0	0	10	0	1.97857	0	1.87207	0	0	0	4.73023	1.65289	0	0	0	8.23681	0	0	0	13.5211	1.97368	0
Amphicoryna scalaris	0	0	0	0	0	0	0	0	0	0	0	0	0	0	0	0	0	0	0	0	0	0	0	0	0	0	0	0	0	0	0	0	0	0	0	3.96476	0	0	0	0	0	0	0	1.44231	0	0	0	0	0.192308
Angulogerina angulosa	0	0	0	0	0	0	0	0	0	0	0	0	0	0	0	0	0	0	0	0	0	0	0	0	0	0	0	0	0	0	0	0	0	0	0	0	0	0	0	0	0	0	0	0	0	0	0	0	0
Astacolus crepidulus	0	0	0	0	0	0	0	0	0	0	0	0	0	0	0	0	0	0	0	0	0	0	0	0	1.63934	0	0	0	0	0	0	0	0	0	0	0	0	1.18256	0.826446	0	0	0	0	0	0	0	0	0	0
Bigenerina irregularis	0	0	0	0	0	0	0	0	0	0	0	0	0	0	0	0	0	0	0	0	0	0	0	0	0	0	0	0	0	0	0	0	0	0	0	0	0	0	0	0	0	0	0	0	0	0	0	0	0
Bolivina compacta	0	0	0	0	0	0	0	0	0	0	0	0	0	0	0	0	0	0	0	0	0	0	0	0	0	0	0	0	0	0	0	0	0	0	0	0	0	0	0	0	0	0	0	0	0	0	0	0	0
Bolivina doniezi	0	0	0	0	0	0	0	0	0	0	0	0	0	0	0	0	0	0	0	0	0	0	0	0	0	0	0	0	0	0	0	0	0	0	0	0	0	0	0	0	0	0	0	0	0	0	0	0	0
Bolivina ligularia	0	0	0	0	0	0	0	0	0	0	0	0	0	0	0	0	0	0	0	0	0	0	0	0	0	0	0	0	0	0	0	0	0	0	0	0	0	0	0	0	0	0	0	0	0	0	0	0	0
Bolivina ordinaria	0	0	0	0	0	0	0	0	0	0	0	0	0	0	0	0	0	0	0	0	0	0	0	0	0	0	0	0	0	0	0	0	0	0	0	0	0	0	0	0	0	0	0	0	0	0	0	0	0
Bolivina striatula	2.7027	0	0.699301	4.75285	3.22581	0	0	1.38889	1.94175	0	0	0.997506	0	40	0	2.73973	2.88462	0	0.444444	1.62602	0	0	4.7619	0.947867	3.27869	11.4286	5.88235	0	14.1593	0	8.69565	5.9357	6.15385	20.2808	8.05785	5.28634	5.31915	3.54767	0.826446	4.10959	13.3333	0	3.6036	4.80769	19.3396	10.3306	10.4225	9.21053	8.46154
Bolivina pulchella	0	0	0	0	0	0	0	0	0	0	0	0	0	0	0	0	0	0	0	0	0	0	0	0	0	0	0	0	0	0	0	0	0	0	0	0	0	0	0	0	0	0	0	0	0	0	0	0	0
Buccella peruviana	5.40541	31.3725	46.8531	23.7643	21.5054	12.0344	23.6364	41.6667	35.4369	38.8889	50.4673	34.9127	68.9655	0	46.3415	31.5068	54.8077	50.5882	26.6667	51.2195	18.75	44.6809	49.2063	43.6019	19.6721	2.85714	29.4118	6.72269	2.94985	5	4.34783	0	0.769231	0	2.47934	0	4.25532	1.18256	0	2.46575	0	3.50877	3.6036	4.80769	0.471698	0.413223	1.40845	5.92105	0.961538
Bulimina elongata	0	0	15.3846	0	1.07527	0	0	1.38889	1.94175	0	0.934579	0	0	30	4.87805	4.10959	3.84615	3.52941	2.22222	0	0	0	0	0	1.63934	0	0	0	0	5	0	0	0	0	0	0	3.19149	0	0	0	0	0	0	0	0	0	0	0	0
Bulimina marginata	0	0	0.699301	0	3.22581	0	0	1.38889	11.6505	0	0.934579	0.997506	0	0	4.87805	4.10959	0	1.17647	34.6667	4.87805	0	4.25532	9.52381	0.473934	6.55738	18.5714	29.4118	90.7563	67.2566	0	0	23.7428	33.8462	37.4415	47.624	3.96476	24.4681	20.6948	37.1901	28.7671	0	3.50877	5.14801	8.17308	8.01887	3.30579	16.0563	2.63158	4.03846
Bulimina patagonica	0	0	0	0	0	0	0	0	0	0	0	0	0	0	0	0	0	0	0	0	0	0	0	0	0	14.2857	0	0	0	0	0	0	0	0	0	0	0	0	0	0	0	0	0	0	0	0	0	0	0
Buliminella elegantissima	0	0	1.3986	0	0	0	0	0	5.82524	0	0	0.498753	10.3448	0	9.7561	0	0.961538	0	0.888889	0	0	2.12766	12.6984	5.6872	0	8.57143	0	0	0.884956	40	39.1304	9.23331	0	0	0	0.440529	0	2.36511	0.826446	2.19178	20	15.7895	7.20721	2.40385	0.943396	0	5.91549	16.7763	1.53846
Cancris sacra	0	0	0	0	0	0	0	0	0	0	0	0	0	0	0	0	0	0	0	0	0	0	0	0	0	0	0	0	0	0	0	1.97857	1.53846	3.12012	0.929752	0	4.25532	2.36511	3.30579	1.64384	0	0	0	1.44231	0	0.413223	0.56338	0	0
Cassidulina crassa porrecta	0	0	0	8.42839	2.68817	2.29226	0	0	0	0	0	0	0	0	0	0	0	0	0	0	0	0	0	0	0	0	0	0	0	0	0	0	0	0	0	0	0	0	0	0	0	0	0	0	0	0	0	0	0
Cassidulina subglobosa	0	0	3.4965	0	32.2581	19.7708	56.3636	1.38889	2.91262	11.1111	0	0	6.89655	0	0	0	5.76923	0	4.88889	4.06504	18.75	2.12766	0	0	0	0	0	0	1.17994	0	0	5.27617	3.84615	0	10.8471	45.3744	15.9574	2.36511	2.06612	19.1781	0	0	1.0296	21.6346	37.5	33.0579	17.7465	17.1053	59.6154
Cassidulinoides parkerianus	0	0	0	0	0	5.15759	0	0	0	0	0	0	0	0	0	0	0	0	0	0	0	0	0	0	0	0	0	0	0	0	0	0	0	0	0	0	0	0	0	0	0	0	0	0	0	0	0	0	0
Cibicides sp.	0	0	0	0	0	0	0	0	0	0	0	0.997506	0	0	0	1.36986	0	0	0	1.62602	0	0	0	0	1.63934	0	0	0	0	10	0	0	0	0	0	0	0	0	0	0	0	0	0.514801	0	0	0	0	0	0
Cibicides fletcheri	0	0	0	0	2.15054	0	0	0	1.94175	0	0	0	0	0	0	0	0	0	0	0	0	0	0	0	0	0	0	0	0	0	0	0	0	0	0	0	0	0	0	0	0	0	0	0	0	0	0	0	0
Cibicides mackannai	0	0	0.699301	0	3.22581	6.30372	5.45455	20.8333	0	0	0	0	0	0	0	0	8.65385	7.05882	4.88889	0	0	0	0	0	0	0	0	0	0.294985	0	0	0	0	0	0	3.52423	0	0	0	0	0	0	0	0.961538	0.235849	0	0	0	0
Cibicides refulgens	0	0	0	0	0	0	0	0	0	0	0	0	0	0	0	0	0	2.35294	2.66667	0	0	0	0	0	0	0	0	0	0.884956	0	0	0	0	0	0	0	0	0	0	0	0	0	0	0	0.943396	0	0	0	0
Cibicides variabilis	0	0	2.0979	0	0	0	0	0	0.970874	0	0	0	0	0	0	0	0	0	2.22222	0.813008	0	0	0	0	0	0	0	0	0	0	0	0	0	0	0	0	2.12766	0	0	0	0	0	0	0	0	0	0	0	0
Cornuspyra involves	40.5405	0	0	0	0	0	0	0	0	0	0	0	0	0	0	0	0	0	0	0	0	0	0	0	0	1.42857	0	0	0	0	0	0	0	0	0	0	0	0	0	0	0	0	0	0	0	0	0	0	0
Discorbis williamsoni	0	21.5686	3.4965	0.316857	0	0	0	4.16667	6.31068	0	10.2804	34.6633	6.89655	20	0	5.47945	0.961538	0	0	7.31707	56.25	17.0213	1.5873	0	4.91803	1.42857	11.7647	0.840336	0	0	0	0	0	0	0.309917	0	0	0	0	1.64384	0	0	0	0	0	0	0.28169	0.657895	0.384615
Discorbis peruvianus	0	0	0	0	0.537634	0	0	0	0	0	0	0	0	0	26.8293	6.84932	0	0	0	0	0	0	0	0	0	0	0	0	0	0	0	0	0	0	0	0	0	0	0	0	0	0	0	0	0	0	0	0	0
Dentalina sp.	0	0	0	0	0	0	0	0	0	0	0	0	0	0	0	0	0	0	0	0	0	0	0	0	0	0	0	0	0	0	0	0	0	0	0	0	0	0	0	0	0	0	0	0	0	0	0	0	0
Ehrenbergina pupa	0	0	0	0	0	0	0	0	0	0	0	0	0	0	0	0	0	0	0	0	0	0	0	0	0	0	0	0	0	0	0	0	0	0	0	0	0	0	0	0	0	0	0	0	0	0	0	0	0
Elphidium discoidale	0	0	0	0	0	0	0	0	0	0	0	0	0	0	0	0	0	0	0	0	0	0	0	0	0	0	0	0	0	0	0	0	0	0	0	0	0	0	0	0	0	0	0	0	0	0	0	0	0
Elphidium excavatum	0	0	0	0	0	0	0	0	9.70874	0	6.54206	0	6.89655	0	0	0	0	0	0	0	0	0	0	0	0	0	0	0	0	0	0	0	0	0	0	0	0	0	0	0	0	0	0	0	0	0	0	0	0
Elphidium gunteri	0	0	0	0	0	0	0	0	0	0	0	0	0	0	0	0	0	0	0	0	0	0	0	0	0	0	0	0	0	0	0	0	0	0	0	0	0	0	0	0	0	0	0	0	0	0	0	0	0
Elphidium poeyanum	0	0.980392	1.3986	2.218	0.537634	0	0	0	0	0	0	3.49127	0	0	7.31707	0	0	0	0	0	0	17.0213	1.5873	40.2844	21.3115	1.42857	0	0	0	20	43.4783	25.474	0.769231	4.36817	0	0.881057	0	0	0	5.20548	0	49.1228	28.314	2.40385	0.471698	0	2.8169	19.4079	1.73077
Fissurina laevigata	0	0	0	1.26743	0	1.7192	0	0	0.970874	0	0.934579	0.498753	0	0	0	0	0	0	0.444444	1.62602	0	0	0	0	0	0	0	0	0	0	0	0.659522	0.769231	0	0	0	0	4.13895	0.413223	0.273973	0	0	0	0.961538	0	0.413223	0.56338	0.657895	0
Fursenkoina pontoni	0	0	0	1.26743	0	0	0	0	0	0	0	0	0	0	0	0	0	0	0	0	0	0	0	0	0	0	0	0	0	0	0	0	0	0	0	0	0	0	0	0	0	0	0	0	0	0	1.97183	0	0
Fursenkoina sp.	0	0	0	0	0	0	0	0	0	0	0	0	0	0	0	0	0	0	0	0	0	0	0	0	0	0	0	0	0	0	0	0	0	0	0	0	0	0	0	0	0	0	0	0	0	0	0	0	0
Hanzawaia boueana	0	0	0.699301	7.92142	2.15054	0	0	2.77778	0.485437	0	0	0.498753	0	0	0	1.36986	0	0	0	0.813008	0	0	0	0	0	0	0	0	0	0	0	0	0	0	0.929752	4.84581	0	1.18256	1.23967	8.21918	26.6667	0	0	24.0385	1.17925	0	7.60563	7.56579	0.384615
Gutulina sp.	0	0	0	0	0	0	0	0	0	0	0	0	0	0	0	0	0	0	0	0	0	0	0	0	0	0	0	0	0	0	0	0	0	0	0	0	0	0	0	0	0	0	0	0.961538	0	0	0	0	0
Hoeglundina elegans	0	0	0	0	0	0	0	0	0	0	0	0	0	0	0	0	0	0	0	0	0	0	0	0	0	0	0	0	0	0	0	0	0	0	2.78926	0	0	0	0	0	0	0	0	0	0	0	0	0	0
Hopkinsina pacifica	0	0	0.699301	0	0	0	0	0	0.485437	0	0	0	0	0	0	0	0	0	2.66667	5.69106	0	0	0	0	3.27869	2.85714	0	0	0	0	0	5.27617	0	0	0	0	0	0	0	0.547945	0	0	0	0	0	0	0	0	0
Lagena caudata	0	0	0	0	0	0	0	0	0	0	0	0	0	0	0	0	0	0	0	0	0	0	0	0	0	0	0	0	0	0	0	0	0	0	0	0	0	0	0	0	0	0	0	0	0	0	0	0	0
Lagena distoma	0	0	0	0	0	0	0	0	0	0	0	0	0	0	0	0	0	0	0.444444	0	0	0	0	0	0	0	0	0	0	0	0	0	0	0	0	0	0	0	0	0	0	0	0	0.961538	0.471698	0	0	0	0
Lagena laevis	0	0	0	0	0	0	0	0	0	0	0	0	0	0	0	0	0	0	0	0	0	0	0	0	0	0	0	0	0	0	0	0.659522	0.769231	0	0	0	0	0	0	0	0	0	0	0	0	0	0	0	0
Lagena striata	0	0	0	0.316857	0.537634	0	0	0	0	0	0	0	0	0	0	1.36986	1.92308	0	0	1.62602	0	0	0	0	0	0	0	0	0.294985	0	0	0	0	0	2.78926	0	0	0	0	0.273973	0	0	0	1.92308	0.235849	1.23967	0.56338	0	0
Lenticulina sp.	0	0	0	0	0	0	0	0	0	0	0	0	0	0	0	0	0	0	0	0	0	0	0	0	0	2.85714	0	0	0.589971	0	0	0	0	0	0	7.92952	0	0	0.413223	0	0	0	0	0	4.48113	0	0	0	0
Marginulina spp.	0	0	0	0	0	0	0	0	0	0	0	0	0	0	0	0	0	0	0	0	0	0	0	0	0	0	0	0	0	0	0	0	0	0	0	0	0	0	0	0	0	0	0	0	0	0	0	0	0
Miliolinella subrotunda	0	0	0	0	0	0	0	0	0	0	0	0	0	0	0	0	0	0	0	0	0	0	0	0	0	0	0	0	0	0	0	0	0	0	0	0	0	0	0	0	0	0	0	0	0	0	0	0	0
Nonionella opima	0	0	0	0	0	0	0	0	0	0	0	0	0	0	0	0	0	0	0	0	0	0	0	0	0	0	0	0	0	0	0	0	0	0	0	0	0	0	0	0	0	0	0	0	0	0	0	0	0
Oolina melo	0	0	0	0	0	0	0	1.38889	0	0	0	0	0	0	0	0	0	0	0	0	0	0	0	0	0	0	0	0	0.294985	0	0	0	0	0	0	1.32159	2.12766	1.18256	0	0	0	0	0	0	0	0	0	0	0
Oolina vilarboana	0	0	0	0	0	0	0	0	0	0	0	0	0	0	0	0	0	0	0	0	0	0	0	0	0	0	0	0	0	0	0	0	0	0	0.309917	0	0	0	0	0	0	0	0	0	0	0	0	0	0
Oolina universa	0	0	0	0	0	0	0	0	0	0	0	0	0	0	0	0	0	0	0	0	0	0	0	0	0	0	0	0	0	0	0	0	0	0	0	0	0	0	0	0	0	0	0	0	0	0	0	0	0.192308
Orthomorphina filiformis	0	0	0	0.633714	0	0	0	0	0	0	0	0	0	0	0	0	0	0	0	0	0	0	0	0	0	0	0	0	0	0	0	0	0.769231	1.24805	0.309917	0	0	0	0	0	0	0	0	1.44231	0	0	0	0	0
Poreoponides lateralis	0	0	0	0	0	0	0	0	0	0	0	0	0	0	0	0	0	0	0	0	0	0	0	0	0	0	0	0	0	0	0	0	0	0	0	0	0	0	0	0	0	0	0	0	0	0	0	0	0
Pseudononion atlanticum	0	0	0	0	0	0	0	0	0	0	0	0	0	0	0	0	0	1.17647	0.888889	1.62602	0	2.12766	1.5873	1.89573	6.55738	27.1429	0	0	6.78466	10	4.34783	5.27617	10	11.8565	0.929752	6.60793	7.44681	14.782	8.67769	13.6986	40	22.807	30.888	7.69231	5.66038	5.3719	10.7042	16.1184	2.69231
Pullenia bulloides	0	0	0	0	0	0	0	0	0	0	0	0	0	0	0	0	0	0	0	0	0	0	0	0	0	0	0	0	0	0	0	0	0	0	2.16942	1.32159	0	0	0	0	0	0	0	1.92308	0	0	0	0	0
Pyrgo nasuta	0	0	4.8951	0	0	0	0	0	0	0	0	1.99501	0	0	0	0	0	0	0	0	0	0	0	0	6.55738	0	0	0	0.589971	0	0	1.31904	0	4.36817	0	0	0	0	0	0.821918	0	0	0	3.36538	0.471698	0	0.56338	0.986842	0.192308
Pyrgo peruviana	0	0	0	0	0	0	0	0	0	0	0	0	0	0	0	0	0	0	0	0	0	0	0	0	0	0	0	0	0	0	0	0	0	0	0	0	0	0	0	0	0	0	0	0	0	0	1.40845	0	0
Pyrgo rigens	0	16.6667	0	0.316857	0	0	0	0	1.94175	0	1.86916	2.49377	0	0	0	0	0	0	0	0	0	0	0	0.947867	0	1.42857	0	0	0	0	0	0	0	0	0	0	0	0	0	0	0	0	0	0	0	0	0	0	0
Quinqueloculina horrida	0	0	0	0	0	0	0	0	0	0	0	0	0	0	0	0	0	0	0	0	0	0	0	0	0	0	0	0	0	0	0	0	0	0	0	0	0	0	0	0	0	0	0	0	0	0	0	0	0
Quinqueloculina lamarckiana	0	0	2.0979	0	0	0	0	0	0	0	0	0	0	0	0	0	0	0	0.444444	0	0	0	0	0.473934	3.27869	1.42857	0	0	0	0	0	0.659522	0	1.87207	0	0	0	0	0	0	0	0	0	0	0	0	0	0	0.384615
Quinqueloculina miletti	37.8378	9.80392	0	0	0.537634	0	0	0	0	0	16.8224	8.97756	0	0	0	23.2877	0	0	0	0	0	6.38298	0	0	0	0	17.6471	0	0	0	0	0	0	0	0	0	0	0	0	0	0	3.50877	0	0	0	0	0	0	0
Quinqueloculina patagonica	5.40541	0	8.39161	0	0.537634	0	0	0	0.485437	0	0	0	0	0	0	2.73973	2.88462	0	1.77778	2.43902	0	2.12766	0	0.473934	8.19672	0	0	0	0	0	0	3.29761	0	0.624025	0.929752	0	1.06383	0	0.826446	0	0	0	3.7323	0	0	0	0.56338	0	0
Robulus sp.	0	0	0	0	0	0	0	0	0	0	0	0	0	0	0	1.36986	0	0	0	0	0	0	0	0	0	0	0	0	0	0	0	0	0	0	0	0	0	0	0	0.273973	0	0	0	2.40385	0.943396	0.826446	0.56338	0	2.88462
Spiroculina depressa	0	0	0	0	0	0	0	0	0.485437	0	0	0.498753	0	0	0	0	0	0	0	0	0	0	0	0	0	0	0	0	0	0	0	0	0	0	0	0	0	0	0	0	0	0	0	0	0	0	0	0	0.384615
Sigmoilina obesa	0	0	0	0	0	0	0	0	0	0	0	0	0	0	0	0	0	0	0	0	0	0	0	0	0	0	0	0	0	0	0	0	0	0	0	0	0	0	0	0	0	0	0	0	0	0	0	0	0
Triloculina	0	0	0	0	0	0	0	0	0	0	0	0	0	0	0	0	0	0	0	0	0	0	0	0.473934	1.63934	0	0	0	0	0	0	0	0	0	0	0	0	0	0.413223	0	0	0	0	0	0	0	0	0	0
Uvigerina bifurcata	0	0	0	0	0	0	0	1.38889	0	0	0	0	0	0	0	0	0	0	0	0	0	0	0	0	0	0	0	0	0	0	0	0	12.3077	0	4.64876	0	0	0	39.2562	0	0	0	0	0	0	0	0	0	0
Uvigerina peregrina	0	0	0.699301	17.4271	18.8172	47.5645	5.45455	0	0	0	0	0	0	0	0	0	0	1.17647	0	0	0	0	0	0	0	1.42857	5.88235	0	3.24484	0	0	0.659522	3.84615	4.21217	6.19835	12.3348	23.4043	38.4331	0	6.57534	0	0	3.6036	4.80769	18.6321	44.6281	5.07042	0	14.8077
Virgulina riggi	0	0	0	0	0	0	0	0	0	0	0	0	0	0	0	0	0	0	0	0	0	0	0	0	0	0	0	0	0	0	0	0	0	0	0	0	0	0	0	0	0	0	0	0	0	0	0.84507	0	0
Ammobaculites exigus	0	0	2.0979	0	0	0	0	1.38889	0	0	0	0	0	0	0	0	6.73077	10.5882	4.88889	0	0	0	1.5873	0.473934	0	0	0	0	0	0	0	0	0	0	2.78926	0	2.12766	0	0	0.273973	0	0	0	0	0	0	0	0	0
Ammodiscus sp.	0	0	0	0	0	0	0	0	0	0	0	0	0	0	0	0	0	0	0	0	0	0	0	0	0	0	0	0	0	0	0	0	0	0	0	0	0	0	0	0	0	0	0	0	0	0	0	0	0
Ammoscalaria	0	0	0	0	0	0	0	0	0	0	0	0	0	0	0	0	0	0	0	0	0	0	0	0	0	0	0	0	0	0	0	0	0	0	0	0	0	0	0	0	0	0	0	0	0	0	0	0	0
Ammotium salsum	0	0	0	0	0	0	3.63636	0	0	0	0.934579	0	0	0	0	0	0	2.35294	0.888889	0	0	0	0	0	0	0	0	0	0	0	0	0	0	0	0	0	0	0	0	0	0	0	0	0	0	0	0.56338	0	0
Arenoparella mexicana	0	0	0	0	0.537634	0	0	5.55556	0.485437	0	0	0	0	0	0	0	0	2.35294	1.33333	4.06504	0	0	11.1111	0	4.91803	0	0	0.840336	0	0	0	2.63809	14.6154	4.9922	1.8595	1.76211	0	1.25647	0.826446	0.273973	0	0	0	0	0	0	0.28169	0	0.576923
Deuteramina	0	0	0	0	0	0	0	0	0	0	0	0	0	0	0	0	0	0	0	0	0	0	0	0	0	0	0	0	0	0	0	0	0	0	0	0	0	0	0	0	0	0	0	0	0	0	0	0	0
Gaudryina exillis	0	0.980392	0	0	0	0.573066	0	2.77778	3.39806	0	0	0	0	0	0	1.36986	1.92308	0	1.33333	2.43902	0	0	6.34921	1.89573	3.27869	0	0	0.840336	0	0	0	5.27617	7.69231	3.74415	0	0	0	0	0	0.273973	0	0	0	0	0	0	0	0	0.192308
Haplophragmoides wilberti	0	0	0	0	2.15054	1.14613	1.81818	1.38889	0	0	0	0	0	0	0	2.73973	0	0	0	0	0	0	0	0	0	0	0	0	0	0	0	0	2.30769	0	1.23967	0	0	0	0	0	0	0	0	0	0	0	0	0	0
Miliamina fusca	0	0	0	0	0	0	0	0	0	0	0	0	0	0	0	0	0	0	0	0	0	0	0	0	0	0	0	0	0	0	0	0	0	0	0	0	1.06383	0.591279	0	0	0	0	0	0	0	0	0	0	0
Protoschista findens	0	0	0	0	0	0	0	0	0	0	0	0	0	0	0	0	0	0	0	0	0	0	0	0	0	0	0	0	0	0	0	0	0	0	0	0	0	0	0	0	0	0	0	0	0	0	0	0	0
Pseudoclavulina curta	0	0	0	0	0	0	0	0	0	0	0	0	0	0	0	0	0	0	0	0	0	0	0	0	0	0	0	0	0	0	0	0	0	0	0	0	0	0	0	0	0	0	0	0	0	0	0	0	0
Pseudoclavulina sp.	0	0	0	0	0	0	0	0	0	0	0	0	0	0	0	0	0	0	0	0	0	0	0	0	0	0	0	0	0	0	0	0	0	0	0	0	0	0	0	0	0	0	0	0	0	0	0	0	0
Reophax curtus	0	0	0	0	0	0	0	0	0	0	0	0	0	0	0	0	0	0	0	0	0	0	0	0	0	0	0	0	0	0	0	0	0	0	0	0	0	0	0	0	0	0	0	0	0	0	0	0	0
Reophax nana	0	0	0	0	0	0	0	6.94444	9.2233	0	0	0.997506	0	0	0	0	0	0	0	3.25203	0	0	0	0	0	0	0	0	0	0	0	0	0	0	0	0	0	0	0.413223	0	0	0	0	0	0	0	0	0	0.192308
Reophax scorpiurus	0	0	2.0979	0	0	1.14613	0	0	0	0	0	0	0	0	0	0	6.73077	11.7647	4	0	0	0	0	0	0	0	0	0	0	0	0	0	0	0	0	0	0	0	0	0	0	0	0	0	0	0	0	0	0
Reophax scotii	0	0	0	0	0	0	0	0	0	0	0	0	0	0	0	0	0	0	0	0	0	0	0	0	0	0	0	0	0	0	0	0	0	0	0	0	0	0	0	0	0	0	0	0	0	0	0	0	0
Remaneica helgolandica	0	0	0	0	0	0	0	0	0	0	0	0.498753	0	10	0	4.10959	0	0	0	0	0	0	0	0.947867	0	0	0	0	0	0	0	0	0	0	0	0	0	0	0	0	0	1.75439	0	0	0	0	0	0	0
Siphotrochamina lobata	0	0	0	0	0	0	0	0	0	0	0	0	0	0	0	0	0	0	0	0	0	0	0	0	0	0	0	0	0	0	0	0	0	0	0	0	0	0	0	0	0	0	0	0	0	0	0	0	0
Textularia earlandi	0	8.82353	0	0	0	0	0	1.38889	0	0	7.47664	6.98254	0	0	0	5.47945	0	0	0	0	6.25	2.12766	0	0	0	0	0	0	0	0	0	0	0	0	0	0.440529	0	0	0	0	0	0	0	0	0	0	0	0.986842	0
Textularia gramen	0	0	0	0	0	0	0	0	0	0	0	0	0	0	0	0	0	0	0	0	0	0	0	0	0	0	0	0	0	0	0	0	0	0	0	0	0	0	0	0	0	0	0	0	0	0	0	0	0
Tiphotrocha comprimata	0	0	0	0	0	0	0	0	0	0	0	0	0	0	0	0	0	0	0	0.813008	0	0	0	0.473934	0	0	0	0	0	0	0	0	0	0	0	0	0	0	0	0	0	0	0	0	0	0	0	0	0
Trochamina inflata	0	9.80392	0	0	2.68817	2.29226	3.63636	1.38889	0	0	0	0	0	0	0	0	0.961538	5.88235	1.33333	0	0	0	0	0	0	0	0	0	0	0	0	0	0	0	0	0	0	0	0	0	0	0	0	1.44231	0	0	0	0	0
Trochamina ochracea	0	0	0	0	0	0	0	0	0	0	0	0	0	0	0	0	0.961538	0	0	0	0	0	0	0	0	0	0	0	0	0	0	0.659522	0	0	1.8595	0	0	0	0	0	0	0	0	0	0	0	0	0	0
Globigerinoides aequilateralis	0	0	0	3.16857	0	0	0	1.38889	0	0	0	0	0	0	0	0	0	0	0	0	0	0	0	0	0	0	0	0	0	0	0	0	0	0	0	0	0	0	0	0	0	0	0	0	0	0	0	0	0
Globgerina falcanensis	0	0	0	0	0	0	0	0	0	0	0	0	0	0	0	0	0	0	0	0	0	0	0	0	0	0	0	0	0	0	0	0	0	0	0	0	0	0	0	0	0	0	0	0	0	0	0	0	0
Globgerina sp.	0	0	0	0	0	0	0	0	0	0	0	0	0	0	0	0	0	0	0	0	0	0	0	0	0	0	0	0	0	0	0	0	0	0	0	0	0	0	0	0	0	0	0	0	0	0	0	0	0
Globigerinoides ruber	0	0	0	17.4271	0	0	0	0	0	0	0	0	0	0	0	0	0	0	0	0	0	0	0	0	0	0	0	0	0	0	0	0	0	0	0	0	3.19149	0	0	0	0	0	0	0	0	0	0	0	0
Globorotalia sp.	0	0	0	0	0	0	0	0	0	0	0	0	0	0	0	0	0	0	0	0	0	0	0	0	0	0	0	0	0	0	0	0	0	0	0	0	0	0	0	0	0	0	0	0	0	0	0	0	0
Globorotalia truncatulinoides	0	0	0	0.633714	0	0	0	0	0	0	0	0	0	0	0	0	0	0	0	0	0	0	0	0	0	0	0	0	0	0	0	0	0	0	0	0	0	0	0	0	0	0	0	0	0	0	0	0	0
Globorotalia menardi	0	0	0	9.5057	0	0	0	0	0	0	0	0	0	0	0	0	0	0	0	0	0	0	0	0	0	0	0	0	0	0	0	0	0	0	0	0	0	0	0	0	0	0	0	0	0	0	0	0	0
Neogloboquadrina duteitrei	0	0	0	0	0	0	0	0	0	0	0	0	0	0	0	0	0	0	0	0	0	0	0	0	0	0	0	0	0	0	0	0	0	0	0	0	0	0	0	0	0	0	0	0	0	0	0	0	0
Neogloboquadrina sp.	0	0	0	0	0	0	0	0	0	0	0	0	0	0	0	0	0	0	0	0	0	0	0	0	0	0	0	0	0	0	0	0	0	0	0	0	0	0	0	0	0	0	0	0	0	0	0	0	0
Thecamoebians	0	0	0	0	1.6129	0	0	0	0	0	0	0	0	0	0	0	0	0	0	0	0	0	0	0	0	0	0	0	0	0	0	0	0	0	0	0	0	0	0.826446	0	0	0	0	0	0	0	0	0	0
Number of total individuals	111	102	715	7890	1116	1745	55	216	2060	18	321	401	29	10	41	73	104	85	225	123	16	47	126	844	61	350	17	952	2034	120	23	1213	130	1282	3872	681	752	1353	968	1460	15	285	1554	5200	6360	242	1775	1520	2600
[truncated: 6 more columns]
