# Supplementary material for: Benthic Foraminifera as Indicators of River Discharge in the Western South Atlantic Continental Shelf Margin
Source: Preprints.org preprint supplement (doi:10.20944/preprints201810.0715.v1), 2018-10-30
Supplement: Supplementary file 3 [file abiotic_summer_table4.xls]

## Sheet: Plan1
Summer	Depth (m)	Salinity UPS	Temperature (C)	Oxygen (mL·L-1)	SM (mg/L)	MO (mg/L)	SiO4(mg/L)	NO2 (mg/L)	NO3 (mg/L)
1	24	33.57	16.69	3.82	7.9	4	3.41184	0.23	1.26
2	47	33.59	11.83	4.19	22	3.9	3.8729	0.12	0.18
3	82	33.57	8.59	5.26
4	85	33.59	7.62	5.81	8.5	0.9	6.27042	0.1	14.18
5	82	33.63	7.11	5.65	7.7	0.6	3.31963	0.1	12.38
6	117	33.69	6.41	5.24	16.4	3.1	5.3483	0.12	18.6
12	112	33.67	7.05	5.16	11.8	4.4	2.66261	0.13	19.63
13	82	33.64	7.32	4.59	15	5.2	2.86742	0.12	19.64
14	74	33.59	8.34	4.89	10.5	4.9	0.870468	0.09	0.49
15	40	33.58	11.56	4.12	1.9	2.3	2.40659	0.35	9.53
16	26	29.71	19.42	4.31	34	10.2	3.22585	0.59	1.53
17	23	32.79	18.19	4.03	18.4	2.5	6.04207	0.07	0.24
19	14	29.1	24.11	5.31	16	2.5	3.63548	0.13	0.79
20	22	30.24	23.22	4.99	14	3.2	2.45779	0.08	0.2
21	25	33.15	17.83	4.26	15.7	3.4	5.78605	0.2	0.72
22	39	33.61	16.92	5.05	15.3	3.4	1.12649	0.1	0.8
23	49	33.55	12.15	4.19	17.8	3.8	2.25298	0.27	5.18
24	95	33.62	7.4	4.72	5.7	3.4	1.2289	0.13	20.87
30	65	33.56	12.8	4.16	59	19	1.91203	0.44	5.93
31	54	33.59	15	5.16	25	12.3	1.27469	0.1	0.39
32	28	33.15	17.69	4.27	22	41.6	1.69958	0.14	1
33	27	32.06	21.88	4.42	21	18.5	0.956016	0.07	0.18
34	40	32.61	16.7	2.57	34	38.7143	10.1444	0.17	5.49
37	23	31.85	20.89	4	19	24.5	3.5585	0.24	1.43
38	34	32.64	17.16	3.81	20	14.7	6.7008	0.2	0.27
39	66	33.04	14.87	2.93	32	21.3	5.55067	1.22	1.25
40	36	32.82	17.13	4.05	21.4	10.4	4.85058	1.5	1.21
41	60	33.43	15.4	4.04	32	9.5	5.55649	0.12	1.27
42	97	34.88	14.57	3.61	19.3	6.3	4.57896	0.04	0.12
48	15	32.17	23.98	5.02	13.7	2.8	3.75578	0.28	3.66
49	19	32.94	23.27	5.1	22.3	7.7	18.676	0.33	5.99
50	42	33.36	15.66	3.34	21.3	8	10.9072	0.18	5.64
51	64	34.72	17.44	2.65	22.5	8	2.26376	0.07	2.81
52	54	34.75	15.93	3.56	13.8	5.1	1.64347	0.15	2.16
53	92	35.85	17.47	4.81	23.9	8.3	6.83894	0.15	4.24
57	103	35.13	19.34	4.44	17.1	3.8	3.33995	0.26	4.48
58	84	35.97	18.4	3.86	26.1	13.5	3.83392	0.39	1.22
59	64	35.95	18.23	4.15	18.7	5	7.20778	0.51	2.86
60	56	35.95	18.6	4.31	26.3	10.5	7.41225	0.17	1.39
61	46	35.74	18.54	3.44	23.7	6.6	3.98728	0.09	0.11
62	27	35.2	20.45	4.28	17.6	2.2	11.6551	0.39	4.9
63	19	34.582	24.29	4.78	15.7	3.2	5.62309	0.17	5.54
64	30	35.82	18.36	3.76	22	8.5	2.9649	0.09	4.8
65	74	35.73	16.76	4.39	18.2	6.1	5.03643	0.09	4.87
66	104	35.62	15.99	3.8	13.6	4.5	4.61231	0.55	4.38
73	104	35.61	16.01	4.09	15.2	5	7.93414	0.41	3.44
75	47	35.76	17.04	4.41	16.08	4.3	8.14432	0.34	6.86
76	31	35.81	17.62	4.21	14.8	3.5	5.14931	0.14	5.45
77	53	35.62	16.16	3.73	13.7	3	2.25939	0.07	5.93
78	75	35.56	15.68	3.96	30.4	8.9	15.4763	1.06	2.66
79	109	35.52	15.4	4.25
87	131	35.39	14.6	5.87
88	100	35.47	15.11	4.15
89	65	35.55	15.88	3.79
90	31	35.64	19.51	3.06
