# Supplementary material for: Benthic Foraminifera as Indicators of River Discharge in the Western South Atlantic Continental Shelf Margin
Source: Preprints.org preprint supplement (doi:10.20944/preprints201810.0715.v1), 2018-10-30
Supplement: Supplementary file 4 [file abiotic_winter_table3.xls]

## Sheet: Plan1
Winter	Depth (m)	Salinity UPS	Temperature (C)	Oxygen (mL·L-1)	SM (mg/L)	MO (mg/L)	SiO4(mg/L)	NO2 (mg/L)	NO3 (mg/L)	% Gravel	% Sand	% Sit and clay
1	24	33.8	10	6.3921	15.2	14		1.46	11.66	10.42	89.58	0
2	44	33.819	10.427	6.2315	23.2	8.8		0.65	5.06	0.4367	98.05	1.512
3	80	33.61	8.139	6.3218	12.4	7.2	10.989	0.94	11	0	96.98	3.02
4	87	33.636	7.593	6.2463	0	0		0.53	11.18	0.1839	99.82	0
5	80	33.85	6.674	6.6914	10.6	5.1	0.7768	0.59	23.01	0	100	0
6	117	33.983	5.52	3.4139	15	10.2	1.3862	0.65	6.87	0	99.36	0.6359
11	110	33.83	6.99	6.803	10.3	6.9	4.8278	0.02	3.31	0	100	0
12	78	33.5	8.44	6.3459			8.35165	0.94	11.68	0.8005	99.2	0
13	72.2	33.55	9.74	6.3518	10.5	8.4				0.3002	98.87	0.8339
14	37	33.688	10.328	6.3897			7.14286	0.51	3.25	0.968	99.03	0
15	31	33.709	10.365	6.4771	0	0		0.09	0.17	0	100	0
16	17.5	33.693	10.213	6.4716	1.6	1.84	16.6628	0.03	1.08	10.89	89.11	0
17	15	33.198	10.83	6.33	6.625	15.75				0	100	0
18	21	33.759	10.849	6.35	10.875	6.875	0.002	0.05	0.06	46.73	53.27	0
19	21	33.734	10.801	6.4	17.4286	9.14286				0	100	0
20	38.3	33.563	10.564	6.4	19.8	1.1	6.1662	0.02	0.63	30.61	69.39	0
21	52.6	33.578	9.842	6.42	12.4	0	3.2982	0.08	3.35	0.4355	99.56	0
22	100	33.612	8.069	6.42	18	10.9	7.14286	0.07	0.07	0	100	0
26	217	35.079	13.259	4.73	16.9	9.5	10.989	0.07	10.13	0	92.77	7.235
27	64.7	33.58	8.692	6.35	19.5	8.9	10.3837	0.47	4.3	0	99.06	0.9418
28	53	33.61	10.1	6.4	17.3	6.7	4.68605	0.32	3.42	0.7407	99.26	0
29	22.6	33.651	10.562	6.41	14.4	14.1	3.73626	0.33	0.08	0	100	0
30	26.4	33.676	10.778	6.43	25.5	8.7	10.8791	0.22	0.77	0	95.62	4.383
31	37.2	33.984	10.984	6.23	31.1579	6.73684	18.4615	0.04	0.05	0	96.84	3.163
32	30.6	32.622	11.179	5.48	26.2857	15.1429		0.13	1.39	0	97.52	2.48
33	20.2	26.528	11.311	6.44	107.6	28	14.9186	0.26	2.2	0	96.34	3.657
34	28	31.373	11.363	5.84	17.1	8.2	9.56977	0.29	2.87	16.91	83.09	0
36	61.9	33.512	10.822	6.16	21.7	8.6	10.3837	0.32	2.95	0	95.75	4.255
37	41	33.482	10.598	6.4	17	6.4	5.6044	0.07	0.02	0	100	0
38	102	35.859	17.42	4.74	20	7.2	3.40659	0.03	0.04	0	93.44	6.559
42	137.8	35.679	16.377	4.39	30.7	10.5	4.72527	0.77	1.01	0	87.91	12.09
43	89	35.37	17.318	4.96	14.3	16.1		0.31	2.44	0	95.63	4.372
44	58	33.115	11.74	5.72	0	0	3.7592	0.83	3.57	0	92.14	7.86
45	54.9	32.974	11.561	5.83	18.4	8.3	0.016	0.23	0.87	0.7631	98.77	0.4645
46	37	29.667	11.846	6.38	15.6	9.5	2.4275	0.55	4.71	32.19	67.81	0
47	20	27.85	11.415	6.63	32.6667	16.1333	0.012	0.33	0.08	0.641	99.36	0
48	11.7	26.976	11.638	6.61	44.8	18	24.7904	0.38	0.13	3.704	96.3	0
49	15	27.8014	12.5386	6.25	57.2	23.2				0	100	0
50	20.1	30.394	11.967	5.45	19.9	9.7	0.054	0.13	0.11	1.046	98.95	0
51	53	32.777	12.769	6.13	11	9.2	13.1744	0.13	3.5	0	97.77	2.227
52	67	34.529	16.402	4.74	27	8.7				0	99.77	0.2326
53	61	35.393	18.042	4.39	23	6.7		0.27	4.22	0	99.7	0.2994
54	85	35.885	17.801	4.65	43.4	23	4.81014			0	100	0
58	144	35.71	16.375	4.53	44	25.6	0.002	0.06	0.11	15.52	84.48	0
59	130	35.862	17.617	4.34	15.8	7.8	1.74122			3.065	96.5	0.433
60	108	35.848	17.713	5.64	24.7	9	8.7884	0.16	0.11	0.1982	93.36	6.44
61	75	35.031	18.193	4.267	25.4286	12.7143	0.018	0.06	0.08	0	96.13	3.872
62	36.6	32.814	14.526	5.077	21.4	8.1	0.013	0.24	2.41	0	97.35	2.646
64	157.7	35.586	15.559	4.52			26.0604			1.547	96.31	2.14
65	136	35.84	17.226	4.32			0.003	0.06	0.04	4.493	90.88	4.626
66	100	35.973	18.196	4.249			1.6507	0.06	5.06	0.3364	98.28	1.379
67	70	35.902	19.26	3.764	15.5	3.6	7.50195			0	99.83	0.1677
68	48	34.054	17.355	5.001	17.5	7.2	20.7692	0.09	3.53	0	99.47	0.5333
69	29	29.569	14.034	6.185	17	4.1	0.058	0.07	3.53	0	99.63	0.3706
70	47.5	30.727	15.028	5.775	16.3	3.7	5.0492	0.35	0.66	2.389	97.61	0
71	68.8	35.637	19.406	4.38	19	4.1	0.022	0.06	0.1	9.393	88.08	2.522
72	105.3	35.9	17.774	4.288	17	4.4	0.067	0.37	0.51	1.603	98.06	0.3339
73	130.3	35.62	15.808	4.476	16.7	5.7	16.9231	0.37	0.9	18.4	80.51	1.092
74	209	35.21	13.003	4.761	22.7	8.7	0.02	0.18	1.52	0.4011	97.23	2.373
79	169.7	35.296	13.586	4.906	31.3	-3.7	6.9912	0.16	0.15	8.04	87.31	4.646
80	115	35.543	15.307	4.271	13.2	4.4	3.4956	0.19	0.16	8.097	87.74	4.165
81	94.1	35.884	19.587	4.238	16.5	4.5	3.4956	0.22	0.62	0.9967	97.71	1.296
82	60.9	33.42	17.878	5.724	11.6	4.6	2.5246	0.09	3.08	0	98.98	1.019
83	27.6	32.57	17.054	5.49	16.6	8.2	2.1362	0.12	7.1	0	97.47	2.53
